# Supplementary material for: Electoral systems and income inequality: a tale of political equality
Source: Springer Nature journal article supplement (doi:10.1007/s00181-021-02154-9), 2021-10-21
Supplement: 181_2021_2154_MOESM1_ESM.pdf [file 181_2021_2154_MOESM1_ESM.pdf]

## 4.1 Online Supplementary Material

### 4.1.1 Regression models weighted by population size

Table S1: Electoral Systems and Political Equality in Income Inequality

| Dependent variable: Pre-tax Gini Index (SWIID Gini market) |                      |                      |                      |                      |                      |                      |
|------------------------------------------------------------|----------------------|----------------------|----------------------|----------------------|----------------------|----------------------|
|                                                            | (1)                  | (2)                  | (3)                  | (4)                  | (5)                  | (6)                  |
|                                                            | WG                   | WG                   | WG                   | WG                   | WG                   | WG                   |
|                                                            | annual               | 5yr                  | 10yr                 | annual               | 5yr                  | 10yr                 |
| L.Gini Market                                              |                      |                      |                      | 0.963***<br>(0.008)  | 0.946***<br>(0.017)  | 0.983***<br>(0.026)  |
| L.PR                                                       | -0.037***<br>(0.012) | -0.033***<br>(0.012) | -0.059***<br>(0.018) | -0.003<br>(0.002)    | -0.006<br>(0.004)    | -0.009**<br>(0.004)  |
| L.PE                                                       | -0.029<br>(0.028)    | -0.026<br>(0.032)    | -0.082***<br>(0.029) | -0.008**<br>(0.004)  | -0.013*<br>(0.008)   | -0.026***<br>(0.007) |
| L.PR*PE                                                    | 0.066***<br>(0.023)  | 0.055**<br>(0.023)   | 0.093***<br>(0.029)  | 0.006<br>(0.004)     | 0.011*<br>(0.006)    | 0.017***<br>(0.006)  |
| L.GDP pc (log)                                             | 1.491***<br>(0.396)  | 1.666***<br>(0.406)  | 1.321***<br>(0.488)  | 0.168***<br>(0.040)  | 0.169***<br>(0.049)  | 0.148**<br>(0.070)   |
| L.GDP pc (log) <sup>2</sup>                                | -0.179***<br>(0.049) | -0.201***<br>(0.050) | -0.161***<br>(0.061) | -0.020***<br>(0.005) | -0.020***<br>(0.006) | -0.019**<br>(0.009)  |
| L.GDP pc (log) <sup>3</sup>                                | 0.007***<br>(0.002)  | 0.008***<br>(0.002)  | 0.006**<br>(0.002)   | 0.001***<br>(0.000)  | 0.001***<br>(0.000)  | 0.001**<br>(0.000)   |
| <i>N</i>                                                   | 2,489                | 502                  | 236                  | 2,489                | 502                  | 236                  |
| No. of Groups                                              | 85                   | 85                   | 84                   | 85                   | 85                   | 84                   |
| log-likelihood                                             | 6932.850             | 1407.688             | 684.579              | 11007.073            | 2235.332             | 1106.054             |
| Within R-squared                                           | 0.716                | 0.721                | 0.781                | 0.989                | 0.990                | 0.994                |

Population-weighted fixed-effects panel data regressions

Country and time fixed-effects included in all models

Full set of controls (Column 7, Table 1) in all models

Clustered standard errors at country level in parentheses \*  $p < .1$ , \*\*  $p < .05$ , \*\*\*  $p < .01$

### 4.1.2 Share of PR countries in the sample

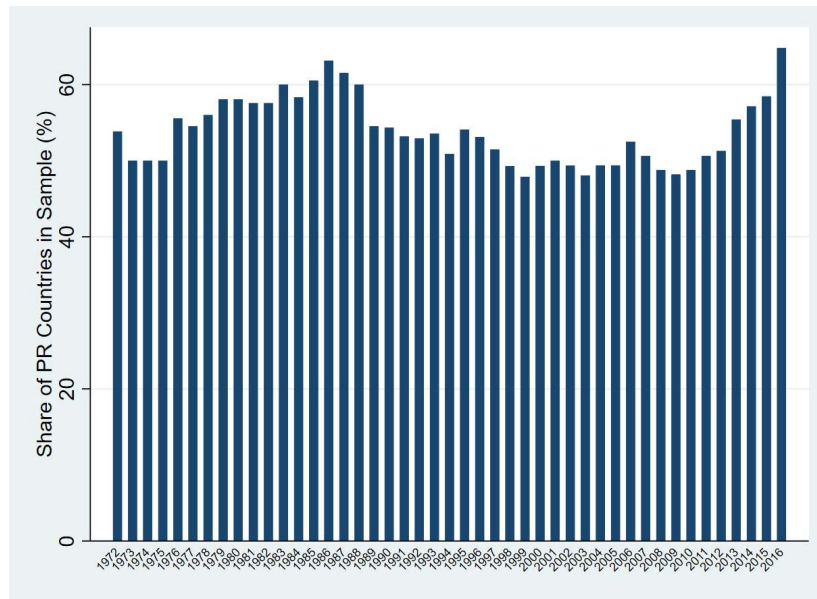

Figure S1: Share of PR Countries in the Sample

### 650 4.1.3 Symmetry of the results

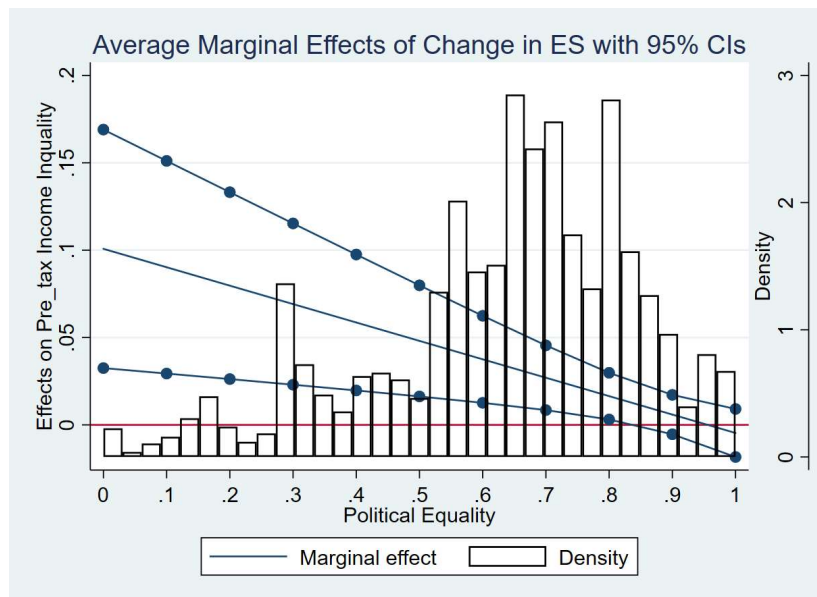

Figure S2: Symmetry of the Main Results
